# Supplementary material
Source: publisher figshare collection journal article supplement (https://brill.figshare.com/ndownloader/files/13395464)
Supplement: Supplementary file 1 [file 13395464]

## Sheet: Character list
Specimen N°	Taxon	Origin	SVL (in mm)	PM1	PM2	PM3	PM4	PM5	PM6	MA1	MA2	MA3	MA4	MA5	MA6	T	SO1	SO2	PF1	PF2	F	PA	POF	ST	SM1	SM2	SM3	SM4	VO1	VO2	PRO	D	CO1	CO2	SR1	SR2	AR1	AR2	AX1	AX2	SC	IL	PU	TI
MNHN 1874-262	bengalensis																																								B	A	3.44	A
MNHN 1883-1828	bengalensis	India		A		A					B		A	A	12			A			A	A																	B	B	B	B	2.96	A
MNHN 1886-634	bengalensis			A						A	B	A	A	A	10	B	A	A	A	2.05	A		A		A	A	A	A	A	A		11	2.36	A		5.16	A
MNHN 1886-649	bengalensis			A	A	A	A	B	7	A	B	A	A	A	10	B	A	A	A	1.96	B	A	B		A	A	A	A	A	A	A	11					A		B	B	B	B	3.55	A
UF 172497	bengalensis	Malaysia	353	A	A	A	A	A	9	A	B	A		A	11	B	A	A	A	2.3	A				A	A	A	A	A	B	A	12	2.69	A			B	A			B	A	3.43	B
UF 34753	bengalensis	Malaysia		A		A	A	B		A	B	A	A	A	11	B	A	A	A	2.33	A	A	A	B	A	A	A	A	A	B	A	12	3.04	A	A	5.01	A	A	B	B	B	A	3.17	A
UF 39074	bengalensis		275	A	B	A	A	A	7	A	B	A	A	A	12	A	A	A	A	2.28	A	A	A	B	A	A	A	A	A	B	A	12	2.79	A	A	5.5	A	A	B	B	B	A	3.79	A
UF 40384	bengalensis	Malaysia		A	A	A	A	A	7	A	B	A	A	A	11				A	2.5	A	A	A	B					A	B														A
UF 40385	bengalensis	Thailand	258	A		A	A	A		A	B	A	A	A	12	A			A	2.12	A	A	A		A	A	A	A	A	B	A	12			A	4.25	A	A	B	B	B	A	3.49	A
UF 40386	bengalensis	Thailand								A	B	A	A	A	11	B	A	A	A	2.14	A	A	A						A	A	A	12	2.9	A	A	5.28	A	A	B	B	B	A	3.54	B
UF 40387	bengalensis	Thailand								A	B	A	A	A	11	B	A	A	A	2.07	A	A	A	B	A	A	A	A	A	A	A	12	2.73	A	A	5.28	A	A	B	B	B			A
UF 40767	bengalensis	Thailand	280	A	B	A	A	A	7	A	B	A	A	A	12	B	A	A	A	2.07	A	A	A	B	A	A	A	A	A	B	A	12	2.83	A	B	4.84	A	A	B	B	B	B	4.03	A
UF 40770	bengalensis	Thailand		A		A	A	A		A	B	A	A	A	11	B	A	A	A	2.42	A	A	A	B	A	A	A	A	A	A	A	12	2.84	A	A	5.18	A	A	B	B	B	A	3.28	A
UF 41165	bengalensis		310	A	B	A	A	A	7	A	B	A	A	A	12	A	A	A	A	2.22	A	A	A	B	A	A	A	A	A	A	A	12	3.33	A	A	5.48	A	A	B	B	B	A	3.21	A
UF 41166	bengalensis		285	A	B	A	A	A	7	A	B	A	A	A	12	B	A	A	A	2.15	A	A	A	B	A	A	A	A	A	A	A	12	2.82	A	A	5.01	A	A	B	B	B	B	3.32	A
UF 41630	bengalensis	Thailand		A	B	A	A	A	9	A	A	A	A	A	10	B					A	A									A	11					A	A	B	B	B	A	2.7
UF 42323	bengalensis	Thailand		A	B	A	A	A	9	A	B	A	A	A	12	B	A	A	A	2.12	A	A	A	B	A	A	A	A	A	A	A	12	2.81	A	A	5.66	A	A	B	B	B	A	3.25	A
UF 42470	bengalensis		300	A	A	A	A	B	9	A	B	A	A	A	11	B	A	A	A	2.13	A	A	A	B	A	A	A	A	A	A	A	12	3.12	A		5.57	A	A	B	B	B	A	3.56	A
UF 42514	bengalensis		270	A		A	A	B	7	A	B	A	A	A	11	B	A	A	A	2.2	A	A	A	B	A	A	A	A	A	B	A	12	2.84	A	A	5.37	A	A	B	B	B	A	3.48	A
UF 44533	bengalensis	Thailand														B					A	A							A	A	A	12	2.72	A	A	5.18	A	A			B	A	3.37	A
UF 45203	bengalensis	Malaysia		A	A	A	A	A	7	A	B	A	A	A	11	B	A	A			A	A	A		A	A	A	A	A		A	12	2.77	A	A		A	A	B	B	B	A	3.08	A
UF 56075	bengalensis		265	A		A		A	7	A	B	A	A	A	12	A	A	A			A	A	A		A	A	A	A	A		A	12	2.15	A			A		B	B	B	A	3.12	A
UF 56076	bengalensis		260	A	B	A	A	A		A	B	A	A	A	11	B					A	A	A		A	A	A	A	A		A	11	2.59	A			A		B	B	B	B	3.56	A
UF 56285	bengalensis			A		A	A	A		A	B	A	A	A	11	B			B	2.44		A	A		A	A	A	A			A	12			A	4.19	A	A	B	B	B	A	2.92	A
UF 56900	bengalensis		340	A	A	A	A	A	7	A	B	A	A	A	11	B	A	A			A	A	A		A	A	A	A	A		A	12	2.95	A			A		B	B	B	A	3.34	A
UF 57143	bengalensis		265	D		A	A	A	7	A	B	A	A	A	12	A	A	A			A	A	A		A	A	A	A	A		A	12	2.87	A			A		B	B	B	A	3.45	A
UF 61022	bengalensis	India	105	A	B	A	A	B	9	A	B	A	A	A		A			D		A	A	B	B	A	B	A	A	A	A	A	11		A	A		A		B	B	B	A	3.57	A
UF 61716	bengalensis	Thailand	170	A	B	A	A	A	7	A	B	A	A	A	12	A	A	A			A	A	A		A	A	A	A	A		A	12	3.05	A			A				B	A	3.27	A
UF 71709	bengalensis	Zoo	185							A	B	A	A	A	11	B	A	A	A	1.97	A	A	A		A	A	A	A	A	A	A	12	2.98	A	A	5.32	A	A			B	A	3.14	A
UF 72476	bengalensis	Zoo	157	A	B	A	A	A	9	A	B	A	A	A	11	A	A	A	A		A	A	B	B	A	A	A	A	A	A	A	12		A			A	A	B	B	B	A	3.65
UF 76528	bengalensis			A	A	A	B	A	7	A	A	A	A	A	10	B	A	A				A	A									12	2.32	A	A	4.57	A	A	B	B	B	A	3.38
UF 76529	bengalensis		508	A	B	A	A	A	7	A	B	B	A	A	11	B	A	A			A	A	A		A	A	A	A	A		A	11	2.83	A			B		B	B	B	A	2.69	B
UF 99302	bengalensis		173	A	B	A	A	A	9	A	B	A	A	A	12	A	A	A			A	A	A		A	A	A	A			A	12	2.91	A			A	A	B	B	B	A	3.38	A
UF 99414	bengalensis		177	A	B	A	A	B	7	A	B	A	A	A	12	A					A	A	B		A	A	A	A				12		A			A	A	B	B	B	A	3.05	A
UF 99785	bengalensis	India	167	A	B	A	A		7	A	B	A	A	A	11	A	A	A			A	A	A		A	A	A	A			A	12	3.07	A			A	A	B	B	B	A	3.24	A
MNHN 1973-108	dumerilii			C	A	A	B	A	7	B	C	B	A	B	9	A			C	1.96	B	B	C	B	A	A	B	A	C	A	B	10	2.08	B		4.2	B		B	B	C	B	3.19	B
UF 37279	dumerilii	Malaysia		C	A	A	B	A	7	B	C	B	A	B	9	A	A	B	C	1.53	B	B	C	B	A	B	B	A	C	A	B	10	2.24	B	B	3.96	B	B	B	B	C	B	2.91	B
UF 42324	dumerilii			C	A	A	B	A	7	B	C	B	A	B	9	A	A	B	C	1.69	B	B	C	B	A	A	A	A	A	A	B	10	2.08	B	B	5	B	B	B	B	C	B	3.48	B
UF 45210	dumerilii		400	C	A	A	B	A	7	B	C	B	A	B	9	A	A	B	C	1.63	B	B	C	B	A	B	B	A	C	A	B	10	2.27	B	B	3.9	B	B	B	B	C	B	4.09	B
UF 45211	dumerilii		360	C	A	A	B	A	7	B	C	B	A	B	8	A	A	B	C	1.63	B	B	C	B	A	B	B	A	C	A	B	10	2.5	B	B	4.14	B	B	B	B	C	B	3.38
UF 45212	dumerilii		460	C		A	B	A	7	B	C	B	A	B	9	A	A	B	C	1.71	B	B	C	B	A	A	B	A	C	A	B	10	2.24	B	B	3.73	B	B	B	B	C	B	3.59	B
UF 50260	dumerilii			C	A	A	B	A	7	B	C	B	A	B	9	A	A	B	C	1.49	A	B	C		A	B	B	A	C	A	B	10	2.21	B		3.82	B	B	B	A	C	B	3.14	B
UF 52000	dumerilii			C	A	A	B	A	7	B	C	B	A	B	9		A	B	C	1.96	B	B	C	B	A	B	B	A	C	A	B		2.33	B		3.95	B	B	B	A	C	B		B
UF 54209	dumerilii	Thailand	440	C	A	A	B	A	7	B	C	B	A	B	8	A		B				B	C				B				B	10	2.32	B			B		B	B	B	B	3.09	B
UF 57009	dumerilii		225	C	A	A	B	A	7	B	C	B	A	B	9	A	A	B	C	1.56	B	B	C	B	A	B	B	A			B	10	1.98	B	B	3.82	B	B	B	B	C	B	3.56
UF 57022	dumerilii		510	C	A	A	B	A		B	C	B	A	B		A	A	B	C	1.84	A	B		B					A	A	B		2.4	B			A	B	B	B	C	B	3.56	B
UF 63821	dumerilii	Thailand	380	C	A	A	B	A	7	B	C	B	A	B	9	A	A	B	C	1.57	B	B	C	B	A	B	B	A	A	A	B	10	2.08	B	B	4.65	B	B	B	B	C	B	2.97	B
UF 67716	dumerilii		450		A		B		7	B	C	B	A	B	9	A	A	B				B	C				B				B	10	2.05	B			B		B	B	C	B	3.13	B
UF 39646	rudicollis			D	B	B	A	A	9	A	A	A	B	A	15	A	B	A	D	2.04	A	A	A	C	B	B	B	B	B		A	13	3.4	A	A	4.92	A	B	A	B	B	A	2.13	B
UF 45128	rudicollis		270	D		B	A	A		A	A	A	B	A	14	A	B	A	D	2.49	A	A	A	C	B	B	B	B	B		A	13	3.4	A	A	5.72	A	A	A	B	B	A	2.3	A
UF 46648	rudicollis		535	D			A	A	9	A	A	B	B	A	14	A	B	A	D			A	B		B	B	B	B	B			13	3.83	A					A	B			2.3
UF 61064	rudicollis	Thailand			B																																				B	A	2.09	A
UF 66037	rudicollis			D	B	B	A	A	9	A	A	B	B	A	15	A	B	A				A			B	B	B	B	B			13	3.17	A					A	B	B		2.22
UF 66049	rudicollis	Thailand		D	B	A	A	A	9	A	A	A	B	A	15	A	B	A				A	B		B	B	B		B		A	13	3.41	A			A		A	B	B	A	2.15
UF 76332	rudicollis		437	D	B	A	A	A	9	A	A	A	B	A	14	A	B	A	D	2.59	A	A	A	C	B		B	B	B		A	13	3.6	A	A	5.05	A	A	A	B	B	A	2.34	A
CU not numbered	rudicollis			D	B	A	A	A		A	A	A	B	A	14	A	B	A	D		A	A	B		B	B	B	B	B		A			A	A		A
MNHN 1886-284	salvator			B			B			A	A	A	A	A			A	A			A	A	B		A	B	B	B			A								A	A	A	A	2.41	A
MNHN 1886-351	salvator																																									A	2.37	A
MNHN 1888-198	salvator			B	A	B	B	B	9	A	A	A	A	A	12	A			D	2.4	A	A	B	A	A	B	B	B		B	A	12	2.34	A		4.95
MNHN 1912-423	salvator																																						B	A	A	A	2.51	A
MNHN 1977-047	salvator				A		B		9		A	A	A		12	A		A				A	B								A	12	3.14	A			A		A	A	A	A	2.32	A
MNHN 1978-511	salvator																																						B	A	A	A	2.76	A
PMJ 1283	salvator			B	A	B	B	B	9	A	A	A	A	A	12	A	A	A	B		A	A	B		A	B	B	B			B	12	1.95	A
PMJ 393	salvator			B	A	B	B	B	9	A	A		A	A	12	A			B	2.74	A	A	B	A	A	B	B	B	C	B	B	12	2.65	A	A	5.31	A	A
PMJ 453	salvator			B	A	B	B	B	9	A	A	A	A	A		A	A	A	B		A	A	B		A	B	B	B			B	12		A
PMJ 455	salvator																																									A	2.42
PMJ 596	salvator			B	A	B	B	B	9	A	A	A	A	A	12	A					A	A	B		A	B	B	B			B	11	2.48	A					A	A	A	A	2.54	A
UF 33161	salvator	Malaysia	830	B	A	A	A	B	9	A	A	A	A	A	12	A	A	A			A	A	B		A	B	B	B			A	12	2.1	A	A		A		B	A	A	A	2.38	A
UF 42322	salvator	India		B	A	B	A	B	9	A	A	A	A	A	12	A			B		A	A	B	A					C	B	A	12	2.56	A	A	4.57	A	A	B	A	A	A	2	A
UF 42686	salvator	Zoo								A	A	A	A	A	11	A			B		A	A	B	A	A	B	B	B	C	B	A	12	2.19	A	A	4.64	A	A	B	A	A	A	2.64	A
UF 42905	salvator	Thailand	270	B	A	B	B	B	7	A	A	A	A	A	12	A	A	A	A	2.54	A	A	B	A	A	B	B	B	C	B	A	12	2.67	A	A	5.09	A	A	A	A	A	A	2.26	A
UF 42967	salvator		225	B	A	B	B	B		A	A	A	A	A	12	A					A	A	B		A	B	B	B	C		A	12	2.54	A			A		B	A	A	A	2.03	A
UF 42968	salvator		440	B	A	B		B	9	A	A	A	A	A	12	A	A	A			A	A	B		A	B	B	B				12	2.41	A			A		B	A	A	A	2.35	A
UF 50999	salvator	Philippines		B	A	B	A	B	7	A	A	A	A	A	12	A	A	A		2.17	A	A	B								A	12	2.56	A			A
UF 53670	salvator	Philippines	345	B	A	A	B	B	9	A	A	A	A	A	12	A	A	A	D	2.43	A	A	B	A	A	B	B	B	C	B	A	12	2.44	A	A	5.09	A	A	A	A	A	A	2.53	A
UF 54862	salvator	Philippines	350	B	A	A		B	9	A	A	A	A	A	11	A	A	A	B	2.18	A	A	B	A					C	B	A	12	2.67	A	A	5.5	A	A	B	A	A	A	2.49	A
UF 54863	salvator	Philippines	350	B	A	B	B	B	9	A	A	A	A	A	12	A	A	A	B	2.15	A	A	B	A	A	B	B	B	C	B		13	2.62	A	A	5.22	A	A		A	A	A	2.5
UF 54864	salvator	Philippines	355	B	A	B	B	B	9	A	A	A	A	A	11	A	A	A	D	2.29	A	A	A	A	A	B	B	B	C	B	A	12	2.35	A	A	5.19	A	A	B	A	A	A		A
UF 55451	salvator	Philippines		B	A	B	A	B	7	A	A	A	A	A	12	A				2.4	A	A	B								A	13	2.44	A			A		B	A	A	A	2.38	A
UF 55452	salvator	Philippines		B	A	B	A	B	7	A	A	A	A	A	11	A					A	A	B		A	B	B	B			A	12	2.77	A			A	A	B	A	A	A	2.7	A
UF 55454	salvator			B	A	B		B		A	A	A	A	A							A	A	B								A		3.54	A					B	A	A	A	2.53	A
UF 56617	salvator		265	B	A	B	B	B	9	A	A	A	A	A	12	A	A	A	B	2.76	A	A	B	A	A	B	B	B	C	B	A	12	2.63	A	A	5.55	A	A			A	A	2.38	A
UF 56879	salvator		380	B	A	B	B	B	9	A	A	A	A	A	12	A	A	A			A	A	B		A	B	B	B	C		A	12	2.42	A			A		A	A	A	A	2.2	A
UF 57014	salvator		350	B	A	B	B	B	9	A	A	A	A	A	12	A			B	2.66	A	A	B	A	A	B	B	B	C	B	A	12	2.64	A	A	5.45	A	A		B	A	A	2.34	A
UF 57018	salvator		330	B	A	B	A	B	9	A	A	A	A	A	12	A			B		A	A	B	A	A	B	B	B	C	B	A	12	2.37	A	A	5.23	A	A	B	A	A	A	2.15	A
UF 61013	salvator	Philippines		B	A	B	A	B	9	A	A	A	A	A	12	A	A	A	B		A	A	B	A	A	B	B	B	C	B	A	12	2.55	A	A	4.98	A	A	B	A	A	A	2.76	A
UF 67491	salvator	Philippines	490	B	A	B	A	B	9	A	A	A	A	A	12	A	A	A	A	2.61	A	A	B	A	A	B	B	B	C	B	A	12	2.39	A	A	5.41	A	A	A	A	A	A	2.67	A
UF 71561	salvator	Thailand		B	A	B	B	B	9	A	A	A	A	A	12	A	A	A	D	2.31	A	A	B	A	A	B	B	B	C	B	A	12	2.82	A	A	5.8	A	A	B	A	A	A	2.2	A
